# Supplementary material for: Stable organic thin film transducers for biochemical and label-free sensing under physiological conditions
Source: Royal Society of Chemistry journal article supplement (doi:10.1039/c2jm32561f), 2012-01-01
Supplement: c2jm32561f.pdf [file c2jm32561f.pdf]

## Stable Organic Thin Film Transducers for Biochemical and Label-Free Sensing Under Physiological Conditions

Mohan Ramesh,<sup>1,2</sup> Hong-Cheu Lin\*,<sup>2</sup> and Chih-Wei Chu\*,<sup>1,3</sup>

<sup>1</sup> Research Center for Applied Sciences, Academia Sinica, Taipei 115, Taiwan

<sup>2</sup> Department of Materials Science and Engineering, National Chiao Tung University Hsinchu 300, Taiwan (ROC)

<sup>3</sup> Department of Photonics, National Chiao Tung University, Hsinchu 300, Taiwan (ROC)

### Supporting Information

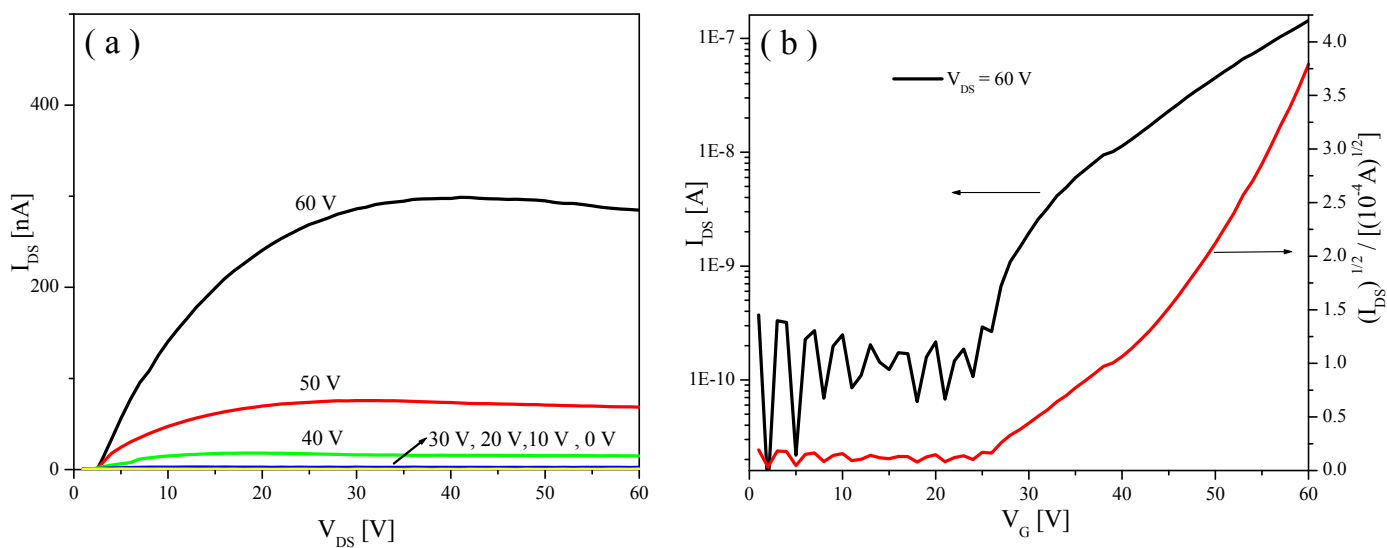

**Fig. S1** (a) Output characteristics of n-channel OTFTs prepared without CYTOP at various values of  $V_G$ . (b) Transfer characteristics of n-channel OTFTs prepared without CYTOP.

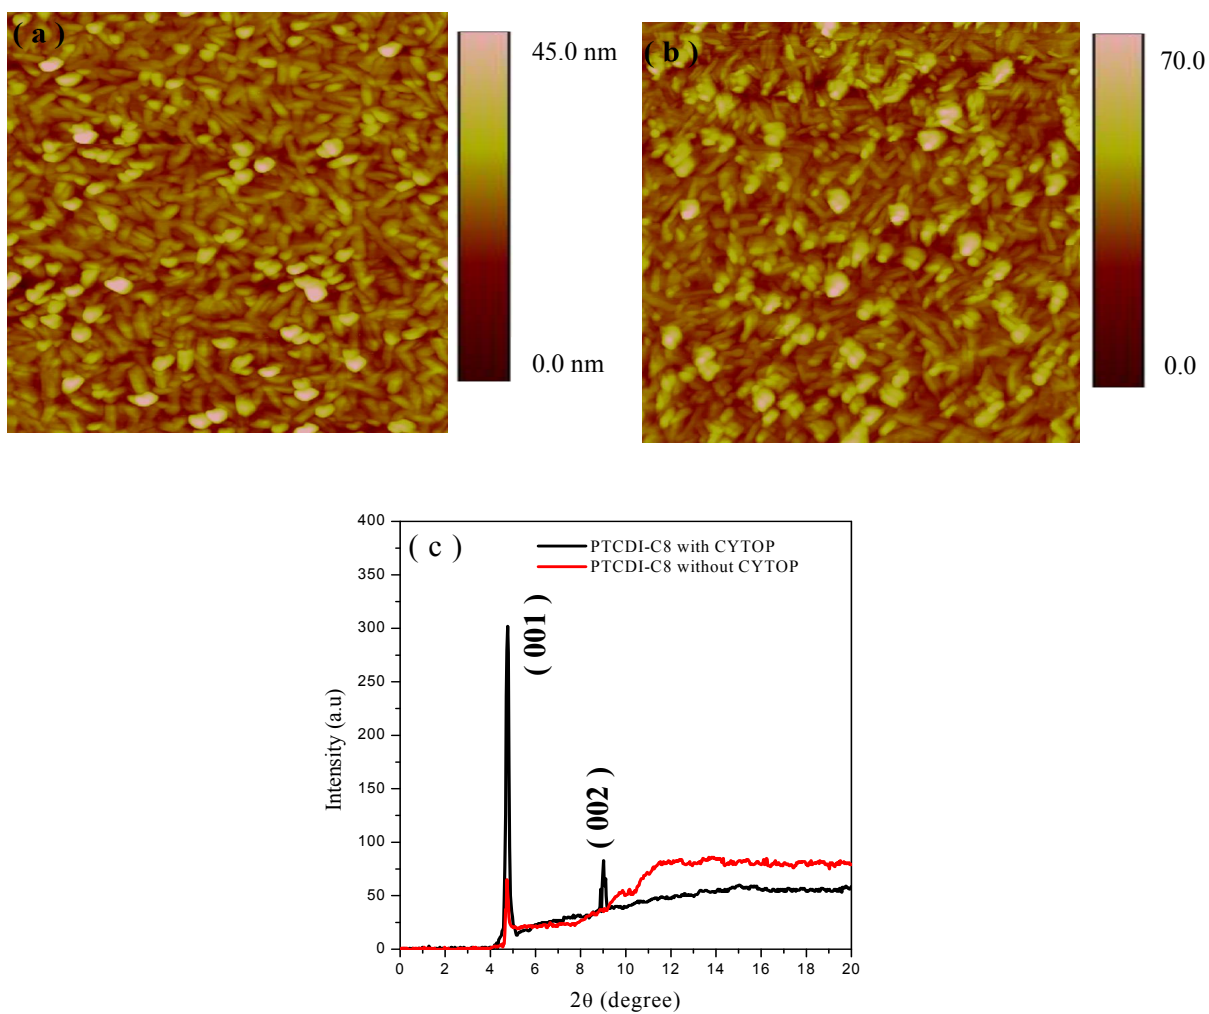

**Fig. S2** (a, b) Atomic force microscopy (AFM) images of PTCDI-C8 films prepared in the (a) presence and (b) absence of CYTOP. (c) 2D XRD spectra of these PTCDI-C8 films.

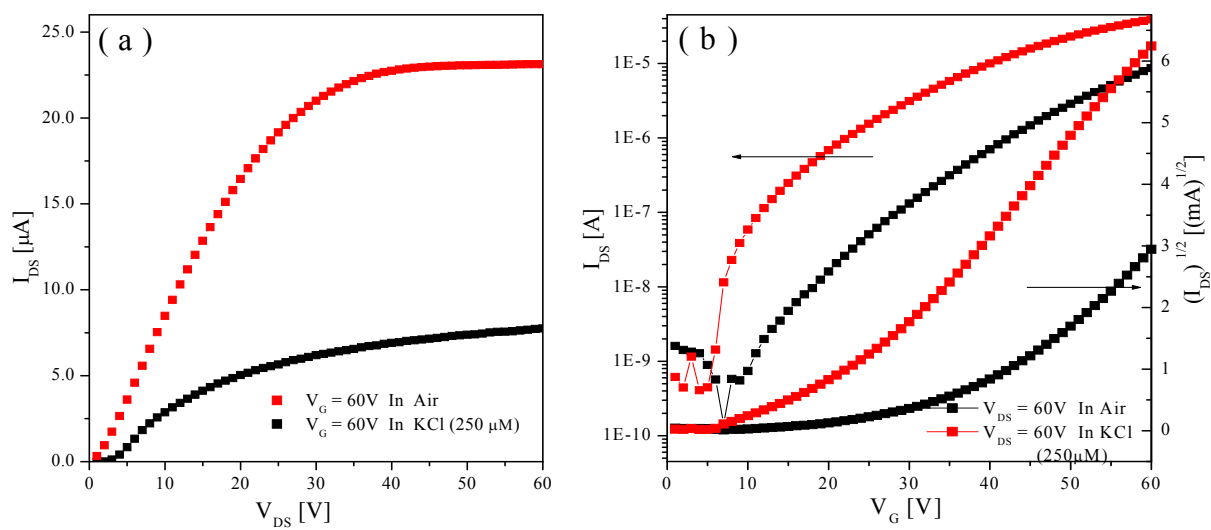

**Fig. S3** (a) Output and (b) transfer characteristics of n-channel OTFTs under ambient conditions and after drying a 2- $\mu$ L drop of KCl solution.

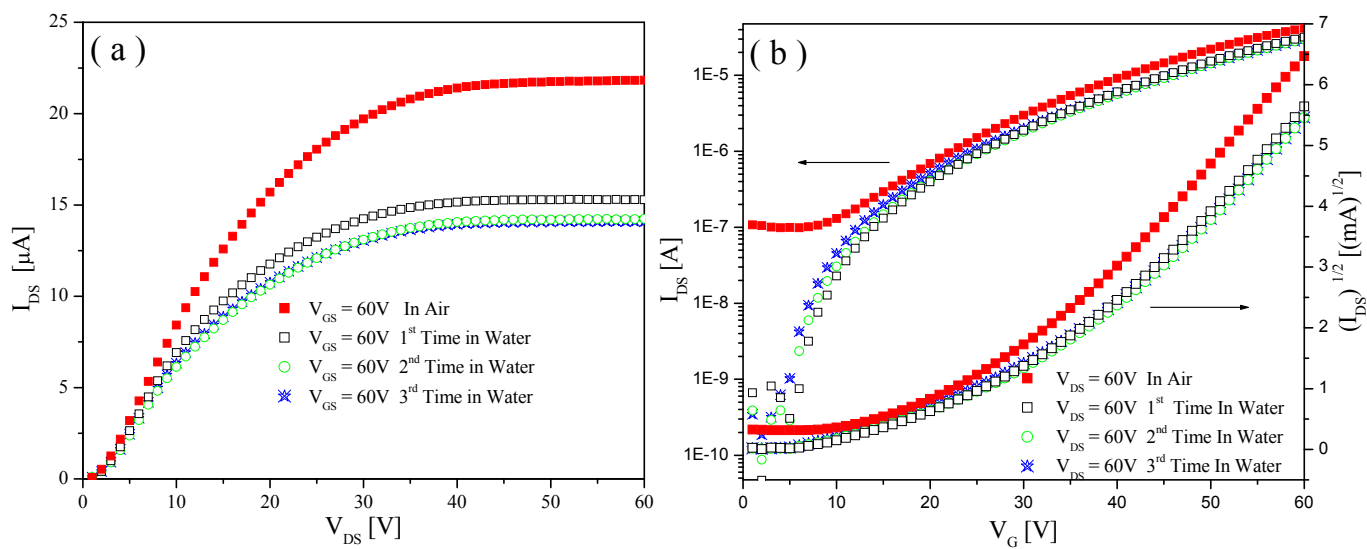

**Fig. S4** (a) Output and (b) transfer characteristics of n-channel OTFTs under ambient conditions and after drying a 2- $\mu L$  drop of distilled water on top of the channel three times.
